# Supplementary material for: Feeling of Pleasure to High-Intensity Interval Exercise Is Dependent of the Number of Work Bouts and Physical Activity Status
Source: PLoS One. 2016 Mar 30;11(3):e0152752. doi: 10.1371/journal.pone.0152752 (PMC4814045; doi:10.1371/journal.pone.0152752)
Supplement: S1 File — Characteristics of the sample and individual responses to high-intensity interval exercise bout. (XLSX) [file pone.0152752.s001.xlsx]

## Sheet: HR, RPE and Affective Response
INSUFFICIENTLY ACTIVE GROUP																	PHYSICALLY ACTIVE GROUP
%HRmax																	%HRmax
AA	72.1649	79.8969	80.4124	83.5052	85.0515	80.4124	82.4742	84.0206	82.9897	85.0515							AA	77.6596	78.7234	84.0426	83.5106	81.9149	83.5106	84.0426	82.9787	82.9787	84.0426
BB	80.402	83.4171	83.9196	83.9196	85.4271	83.4171	83.4171	85.4271	87.4372	85.9296							BB	80	80.5405	82.1622	82.7027	85.9459	85.9459	87.027	86.4865	86.4865	85.4054
CC	71.8919	74.0541	78.3784	78.3784	79.4595	82.7027	81.6216	81.6216	80.5405	84.3243							CC	80	80.4762	81.4286	83.3333	79.5238	82.8571	81.9048	79.0476	79.5238	79.0476
DD	84.8168	85.3403	86.911	89.0052	85.8639	87.4346	86.911	86.911	88.4817	87.9581							DD	83.871	87.6344	88.7097	88.7097	89.7849	89.2473	89.7849	88.172	89.7849	89.2473
EE	76.8473	84.2365	87.6847	88.67	89.6552	90.1478	87.6847	89.6552	88.67	89.6552							EE	81.5	84	86.5	88.5	89.5	90	91	91.5	93	91
FF	73.4375	85.9375	83.3333	83.8542	84.8958	85.9375	88.0208	86.4583	87.5	88.0208							FF	78.4314	80.8824	80.8824	84.3137	86.2745	88.7255	88.2353	89.7059	90.1961	88.2353
GG	66.0099	75.3695	76.8473	80.2956	82.266	82.266	82.7586	82.266	81.7734	83.7438							GG	83.5052	85.567	92.7835	85.0515	81.9588	82.4742	84.0206	85.0515	82.4742	84.0206
HH	75.5208	83.3333	83.3333	88.0208	83.3333	84.8958	90.1042	89.5833	90.1042	91.1458							HH	76.8362	78.5311	77.9661	80.791	80.791	83.0508	81.3559	81.9209	81.3559	83.6158
II	81.6754	88.4817	92.1466	92.6702	93.7173	92.6702	94.7644	95.8115	94.2408	95.8115							II	74.0113	74.5763	82.4859	79.096	85.8757	87.5706	80.226	84.1808	84.7458	83.0508
JJ	69.5187	80.7487	80.7487	80.2139	81.8182	70.5882	84.492	86.0963	82.3529	86.0963							JJ	85.2941	81.1765	85.2941	99.4118	98.8235	98.8235	100	98.2353	99.4118	112.941
KK	90.1639	92.3497	94.5355	94.5355	92.8962	95.082	94.5355	95.6284	97.2678	96.1749							KK	83.1522	86.413	89.6739	93.4783	91.3043	92.9348	94.0217	96.1957	96.1957	91.3043
LL	80.402	85.9296	87.4372	89.4472	89.9497	89.9497	87.9397	88.4422	88.9447	88.4422							LL	69.5431	81.7259	84.7716	85.7868	89.3401	88.8325	86.2944	88.8325	89.3401	89.8477
MM	79.7753	85.3933	90.4494	91.573	91.573	95.5056	98.8764	99.4382	98.3146	99.4382							MM	73.9884	74.5665	76.3006	77.4566	82.0809	80.3468	80.9249	83.815	82.659	79.7688
NN	77.0053	83.9572	83.4225	82.8877	83.9572	82.8877	84.492	82.8877	85.0267	84.492							NN	83.3333	84.3137	87.7451	87.2549	86.7647	84.8039	84.8039	82.3529	81.8627	82.3529
OO	75.1269	80.203	82.7411	81.7259	82.2335	83.2487	84.264	85.7868	86.802	87.8173							OO	80.8383	88.6228	91.6168	91.018	92.2156	92.8144	90.4192	92.2156	91.6168	94.012
PP	82.0755	83.0189	85.8491	86.3208	87.2642	89.6226	89.1509	87.2642	87.2642	91.9811							PP	81.8681	87.3626	88.4615	90.1099	90.1099	89.011	88.4615	89.5604	89.5604	87.9121
QQ	86.0104	84.9741	84.9741	85.4922	87.5648	88.601	92.228	92.7461	92.7461	93.2642							QQ	77.2277	81.6832	84.6535	83.1683	82.1782	84.6535	85.6436	85.1485	82.6733	87.1287
RR	98.3146	101.685	101.685	101.685	103.933	103.933	104.494	103.933	102.809	102.247							RR	83.7563	86.2944	86.802	89.3401	87.8173	89.3401	89.8477	90.8629	90.8629	90.8629
SS	81.2183	81.7259	82.7411	81.2183	81.7259	84.264	85.2792	86.2944	86.802	88.3249							SS	82.9146	87.4372	87.9397	89.4472	89.9497	89.9497	90.4523	90.9548	90.4523	90.4523
TT	86.8687	88.3838	88.3838	92.4242	92.9293	93.9394	86.3636	95.4545	95.4545	95.4545							TT	79.4393	80.8411	83.6449	83.6449	83.6449	83.1776	84.1121	83.1776	83.6449	83.6449
VV	87.9397	86.9347	86.9347	88.9447	83.4171	88.4422	86.9347	88.9447	87.9397	92.9648							VV	85.4054	84.3243	86.4865	89.1892	89.1892	89.1892	88.6486	88.6486	88.1081	88.6486
UU	79.235	85.7923	86.8852	86.8852	90.7104	92.8962	94.5355	97.8142	100	100							UU	90.7609	91.8478	99.4565	102.717	101.63	100.543	102.717	102.717	102.717	102.717
XX	85.7923	90.7104	92.3497	93.4426	94.5355	94.5355	96.1749	96.1749	96.1749	96.7213							XX	84.5771	85.0746	88.0597	89.5522	90.5473	89.5522	91.5423	91.5423	91.0448	93.0348
YY	85.8696	86.9565	88.587	91.3043	92.3913	92.9348	94.5652	94.0217	94.0217	96.7391							YY	74.4565	80.4348	80.9783	83.1522	81.5217	85.3261	84.2391	85.3261	85.8696	85.8696
WW	85.2632	84.7368	93.1579	91.5789	94.2105	97.3684	99.4737	96.3158	93.1579	96.3158							WW	73.7113	73.1959	77.3196	80.9278	78.866	80.4124	79.3814	82.4742	82.4742	80.9278
ZZ	75.2427	81.5534	81.5534	84.9515	89.8058	90.7767	92.233	93.6893	93.2039	96.6019							ZZ	77.8	77.8	77.8	81.2	81.2	84.6	85	87.5	86	86.5
AA1	82.2	85.4	86.9	85.4	85.4	88	84.6	88	90.1	89							AA1	84.4	87.4	88.4	90.4	84.9	89.4	88.4	88.4	90.9	89.4
BB1	87.2	89.7	89.7	90.8	91.3	92.3	91.3	93.3	92.3	93.3							BB1	72.8	73.9	74.4	79.2	78.7	78.7	81.3	80.8	81.9	81.3
CC1	87.7	85.5	88.8	93.3	97.2	99.4	101.1	105.5	105	101.1							CC1	68.3	74.6	79.2	84.4	87	84.4	87	87.5	88.6	88.6
%HRreserve																	%HRreserve
AA	56.0976	68.2927	69.1057	73.9837	76.4228	69.1057	72.3577	74.7967	73.1707	76.4228							AA	68.6567	70.1493	77.6119	76.8657	74.6269	76.8657	77.6119	76.1194	76.1194	77.6119
BB	65.4867	70.7965	71.6814	71.6814	74.3363	70.7965	70.7965	74.3363	77.8761	75.2212							BB	66.6667	67.5676	70.2703	71.1712	76.5766	76.5766	78.3784	77.4775	77.4775	75.6757
CC	46.9388	51.0204	59.1837	59.1837	61.2245	67.3469	65.3061	65.3061	63.2653	70.4082							CC	67.9389	68.7023	70.229	73.2824	67.1756	72.5191	70.9924	66.4122	67.1756	66.4122
DD	76.9841	77.7778	80.1587	83.3333	78.5714	80.9524	80.1587	80.1587	82.5397	81.746							DD	71.4286	78.0952	80	80	81.9048	80.9524	81.9048	79.0476	81.9048	80.9524
EE	62.9921	74.8031	80.315	81.8898	83.4646	84.252	80.315	83.4646	81.8898	83.4646							EE	68.1034	72.4138	76.7241	80.1724	81.8966	82.7586	84.4828	85.3448	87.931	84.4828
FF	58.1967	77.8689	73.7705	74.5902	76.2295	77.8689	81.1475	78.6885	80.3279	81.1475							FF	66.4122	70.229	70.229	75.5725	78.626	82.4427	81.6794	83.9695	84.7328	81.6794
GG	48.5075	62.6866	64.9254	70.1493	73.1343	73.1343	73.8806	73.1343	72.3881	75.3731							GG	76.4706	79.4118	89.7059	78.6765	74.2647	75	77.2059	78.6765	75	77.2059
HH	65.4412	76.4706	76.4706	83.0882	76.4706	78.6765	86.0294	85.2941	86.0294	87.5							HH	64.9573	67.5214	66.6667	70.9402	70.9402	74.359	71.7949	72.6496	71.7949	75.2137
II	70.5882	81.5126	87.395	88.2353	89.916	88.2353	91.5966	93.2773	90.7563	93.2773							II	58.1818	59.0909	71.8182	66.3636	77.2727	80	68.1818	74.5455	75.4545	72.7273
JJ	51.6949	69.4915	69.4915	68.6441	71.1864	53.3898	75.4237	77.9661	72.0339	77.9661							JJ	72.5275	64.8352	72.5275	98.9011	97.8022	97.8022	100	96.7033	98.9011	124.176
KK	84.3478	87.8261	91.3043	91.3043	88.6957	92.1739	91.3043	93.0435	95.6522	93.913							KK	71.5596	77.0642	82.5688	88.9908	85.3211	88.0734	89.9083	93.578	93.578	85.3211
LL	65.4867	75.2212	77.8761	81.4159	82.3009	82.3009	78.7611	79.646	80.531	79.646							LL	51.2195	70.7317	75.6098	77.2358	82.9268	82.1138	78.0488	82.1138	82.9268	83.7398
MM	66.0377	75.4717	83.9623	85.8491	85.8491	92.4528	98.1132	99.0566	97.1698	99.0566							MM	54.5455	55.5556	58.5859	60.6061	68.6869	65.6566	66.6667	71.7172	69.697	64.6465
NN	65.873	76.1905	75.3968	74.6032	76.1905	74.6032	76.9841	74.6032	77.7778	76.9841							NN	77.6316	78.9474	83.5526	82.8947	82.2368	79.6053	79.6053	76.3158	75.6579	76.3158
OO	63.9706	71.3235	75	73.5294	74.2647	75.7353	77.2059	79.4118	80.8824	82.3529							OO	70.3704	82.4074	87.037	86.1111	87.963	88.8889	85.1852	87.963	87.037	90.7407
PP	70.0787	71.6535	76.378	77.1654	78.7402	82.6772	81.8898	78.7402	78.7402	86.6142							PP	73.3871	81.4516	83.0645	85.4839	85.4839	83.871	83.0645	84.6774	84.6774	82.2581
QQ	77.3109	75.6303	75.6303	76.4706	79.8319	81.5126	87.395	88.2353	88.2353	89.0756							QQ	67.6056	73.9437	78.169	76.0563	74.6479	78.169	79.5775	78.8732	75.3521	81.6901
RR	97.0588	102.941	102.941	102.941	106.863	106.863	107.843	106.863	104.902	103.922							RR	76.8116	80.4348	81.1594	84.7826	82.6087	84.7826	85.5072	86.9565	86.9565	86.9565
SS	72.9927	73.7226	75.1825	72.9927	73.7226	77.3723	78.8321	80.292	81.0219	83.2117							SS	74.8148	81.4815	82.2222	84.4444	85.1852	85.1852	85.9259	86.6667	85.9259	85.9259
TT	71.7391	75	75	83.6957	84.7826	86.9565	70.6522	90.2174	90.2174	90.2174							TT	68.1159	70.2899	74.6377	74.6377	74.6377	73.913	75.3623	73.913	74.6377	74.6377
VV	77.7778	75.9259	75.9259	79.6296	69.4444	78.7037	75.9259	79.6296	77.7778	87.037							VV	79.3893	77.8626	80.916	84.7328	84.7328	84.7328	83.9695	83.9695	83.2061	83.9695
UU	66.9565	77.3913	79.1304	79.1304	85.2174	88.6957	91.3043	96.5217	100	100							UU	86.2903	87.9032	99.1935	104.032	102.419	100.806	104.032	104.032	104.032	104.032
XX	75.7009	84.1121	86.9159	88.785	90.6542	90.6542	93.4579	93.4579	93.4579	94.3925							XX	76.1538	76.9231	81.5385	83.8462	85.3846	83.8462	86.9231	86.9231	86.1538	89.2308
YY	76.9912	78.7611	81.4159	85.8407	87.6106	88.4956	91.1504	90.2655	90.2655	94.6903							YY	61.7886	70.7317	71.5447	74.7967	72.3577	78.0488	76.4228	78.0488	78.8618	78.8618
WW	76.6667	75.8333	89.1667	86.6667	90.8333	95.8333	99.1667	94.1667	89.1667	94.1667							WW	61.0687	60.3053	66.4122	71.7557	68.7023	70.9924	69.4656	74.0458	74.0458	71.7557
ZZ	59.8425	70.0787	70.0787	75.5906	83.4646	85.0394	87.4016	89.7638	88.9764	94.4882							ZZ	65.9	65.9	65.9	71.1	71.1	76.2	77	80.7	78.5	79.2
AA1	72.5	77.4	79.8	77.4	77.4	81.4	79	81.4	84.6	83							AA1	75.9	80.6	82.1	85.2	76.7	83.7	82.1	82.1	86	83.7
BB1	79.5	83.6	83.6	85.2	86	87.7	86	89.3	87.7	89.3							BB1	60.7	62.3	63	70	69.2	69.2	73	72.3	73.8	73
CC1	80.8	77.3	82.6	85.5	95.6	99.1	101.7	107.8	107.8	107.7							CC1	52.7	62	68.9	76.7	80.6	76.7	80.6	81.3	82.9	82.9
Rating of Perceived Exertion																	Rating of Perceived Exertion
AA	7	8	11	13	15	18	19	18	18	11							AA	13	13	13	13	14	13	13	14	14	13
BB	13	13	13	13	14	14	14	14	15	15							BB	8	8	8	9	9	9	10	11	11	11
CC	11	10	11	12	12	12	13	14	14	16							CC	7	7	7	7	9	11	13	13	15	15
DD	7	8	10	11	12	13	14	13	14	14							DD	9	11	10	10	11	11	12	11	11	11
EE	8	9	10	12	12	13	14	15	15	15							EE	9	9	11	13	14	16	18	18	18	19
FF	12	12	13	14	13	13	13	13	13	13							FF	11	11	10	10	11	11	11	11	11	12
GG	6	7	8	9	10	10	11	12	12	13							GG	12	13	13	14	13	15	15	16	16	14
HH	13	12	14	13	13	13	13	14	14	14							HH	13	16	17	18	15	18	16	18	18	19
II	11	13	13	14	15	16	16	17	17	16							II	11	13	13	13	14	14	15	15	16	16
JJ	9	11	11	11	12	12	12	13	13	14							JJ	7	7	8	8	10	11	11	13	13	14
KK	7	8	9	10	11	13	12	13	13	13							KK	8	11	11	11	11	11	11	11	11	11
LL	7	9	12	13	13	14	15	16	17	17							LL	8	10	10	12	12	13	13	14	14	14
MM	9	12	13	14	15	16	16	17	17	18							MM	10	10	10	11	12	12	12	12	12	13
NN	13	13	13	13	14	13	13	13	14	14							NN	8	10	12	13	14	14	14	14	15	16
OO	13	14	14	14	15	15	16	16	17	17							OO	9	11	11	12	12	13	13	13	13	14
PP	17	8	17	10	18	13	18	15	18	16							PP	11	11	10	11	12	12	12	12	12	12
QQ	10	10	12	12	13	13	14	14	15	15							QQ	10	12	13	14	14	14	15	15	15	16
RR	8	7	7	7	9	8	10	10	11	11							RR	12	14	14	15	15	16	15	16	16	16
SS	10	8	11	8	11	9	11	9	12	9							SS	12	12	12	14	14	14	15	15	15	16
TT	15	7	13	8	13	10	15	12	15	12							TT	11	11	12	13	14	12	11	12	14	15
VV	14	15	16	13	17	17	18	18	18	18							VV	8	10	13	13	12	12	12	11	12	13
UU	8	8	9	11	11	12	13	13	14	15							UU	12	15	10	14	15	15	15	15	15	16
XX	8	9	10	12	13	14	15	16	16	17							XX	17	17	16	16	15	16	16	17	18	15
YY	6	13	13	11	13	11	13	15	15	15							YY	7	8	10	12	13	14	15	15	16	16
WW	10	10	13	13	14	13	15	14	17	17							WW	13	13	13	13	14	14	14	13	13	12
ZZ	10	12	14	16	15	16	17	17	18	18							ZZ	12	13	13	15	15	16	16	16	16	16
AA1	10	11	12	14	15	16	16	17	17	17							AA1	13	11	11	12	13	13	13	13	14	14
BB1	11	12	14	15	16	18	19	19	20	20							BB1	13	13	13	13	13	15	17	17	17	18
CC1	11	12	14	14	15	15	16	16	16	18							CC1	12	12	13	13	14	16	15	15	16	16
Affective Response																	Affective Response
AA	4	4	2	0	-3	-4	-4	-3	-2	3							AA	1	1	0	1	0	1	0	0	0	1
BB	3	3	2	2	1	0	0	0	0	0							BB	4	4	4	4	3	3	3	3	2	2
CC	0	1	1	0	0	-1	-1	-1	-2	-2							CC	5	5	5	3	3	3	1	1	-1	-1
DD	4	3	2	2	2	1	0	0	-1	-2							DD	3	2	3	3	3	3	2	3	3	3
EE	4	4	2	1	0	-1	-1	-2	-2	-2							EE	4	4	3	2	-1	-1	-3	-3	-2	-4
FF	0	1	0	-1	0	0	-1	-1	-1	0							FF	4	4	4	5	5	5	5	5	5	5
GG	5	5	5	4	3	3	3	2	2	2							GG	2	2	1	1	-1	-1	-1	-3	-2	-1
HH	2	3	1	1	1	0	1	1	1	0							HH	0	-2	-3	-3	-2	-3	-2	-3	-1	-4
II	3	3	2	1	0	-1	0	-1	0	3							II	5	3	3	3	2	1	1	0	0	0
JJ	3	3	3	3	2	1	1	1	1	-1							JJ	5	5	5	5	5	4	4	3	2	3
KK	5	5	5	5	4	2	3	2	2	2							KK	1	1	2	1	3	2	1	1	1	2
LL	4	4	2	0	-1	-2	-3	-3	-3	-3							LL	4	3	3	1	1	1	0	-1	0	-1
MM	3	1	1	-1	-1	-2	-2	-3	-4	-4							MM	4	4	4	4	2	2	2	2	2	1
NN	1	1	0	1	0	1	0	-1	-1	-1							NN	4	4	2	1	1	1	1	0	-1	-2
OO	1	0	0	-1	-2	-2	-3	-3	-4	-3							OO	4	4	4	3	3	3	3	2	2	1
PP	-3	-1	-1	-3	-2	-4	-5	-5	-5	-5							PP	4	4	4	4	4	4	4	4	4	4
QQ	1	0	-1	-3	-5	-5	-5	-5	-5	-5							QQ	4	4	4	3	3	3	3	3	3	2
RR	5	5	5	4	-3	-2	0	0	-1	-3							RR	4	3	3	2	2	2	2	1	1	1
SS	3	3	3	2	2	1	0	-1	-1	-1							SS	5	4	3	3	3	2	2	1	1	1
TT	-2	0	-2	-3	-3	-4	-5	-5	-5	-5							TT	0	1	0	1	-1	1	2	1	1	-1
VV	3	2	1	-1	-1	-1	-2	-3	-3	-3							VV	3	3	4	3	3	4	3	4	3	3
UU	3	2	1	0	-1	-1	-2	-2	-2	-2							UU	3	1	1	0	1	1	1	-2	-2	-2
XX	4	2	0	-1	-2	-3	-3	-3	-3	-3							XX	1	1	1	1	1	0	-1	-2	-3	-1
YY	5	1	1	1	-1	-3	-5	-5	-5	-5							YY	5	4	3	3	1	1	0	-1	-1	-1
WW	3	1	0	-1	-3	-4	-4	-5	-5	-5							WW	3	3	3	3	2	1	1	2	2	2
ZZ	1	0	-1	-2	-3	-3	-3	-3	-3	-4							ZZ	5	4	3	2	1	0	-2	-3	-3	-3
AA1	3	3	1	1	-1	-2	-2	-2	-4	-4							AA1	3	1	1	2	1	1	1	0	-1	-2
BB1	2	2	-1	-1	-1	-1	-1	-2	-2	-4							BB1	1	1	1	1	1	-1	-1	-1	-2	-3
CC1	2	1	0	-1	-1	-2	-3	-3	-3	-3							CC1	5	4	4	3	1	0	-1	-1	-1	-2

## Sheet: Characteristics
INSUFFICIENTLY ACTIVE GROUP																PHYSICALLY ACTIVE GROUP
	Characteristic					IPAQ					Maximal Exercise Test						Characteristic					IPAQ					Maximal Exercise Test
	Age	Weight	Height	BMI		Walking (min)	Moderate Physical Activity (min)	Vigorous Physical Activity (min)	Total Physical Activity (min)		Maximal Treadmill Velocity (km/h)	Training Velocity (km/h)	HRmax (Exercise Test)				Age	Weight	Height	BMI		Walking (min)	Moderate Physical Activity (min)	Vigorous Physical Activity (min)	Total Physical Activity (min)		Maximal Treadmill Velocity (km/h)	Training Velocity (km/h)	HRmax (Exercise Test)
AA	27	88	1.78	27.7743		60	70	0	130		12	10.8	194			AA	24	83	1.71	28.3848	1	80	240	160	480		17	15.5	188
BB	26	87	1.75	28.4082		50	40	20	110		13	11.7	199			BB	21	86	1.75	28.0816	2	0	500	40	540		15	13.5	185
CC	20	55	1.7	19.0311		100	30	0	130		12	10.8	185			CC	29	73	1.76	23.5666	3	80	240	350	670		15	13.5	210
DD	25	64	1.67	22.9481		30	90	0	120		13	11.7	191			DD	30	78	1.74	25.763	4	60	320	150	530		16	14.5	186
EE	20	77	1.83	22.9926		120	0	0	120		16	14.4	203			EE	21	70	1.72	23.6614	5	180	560	120	860		17	15.5	200
FF	31	65	1.68	23.03		40	20	40	100		14	12.6	192			FF	30	86	1.71	29.4108	6	0	480	200	680		18	16.2	204
GG	27	63	1.7	21.7993		0	0	40	40		14	12.6	203			GG	25	72	1.72	24.3375	7	0	540	40	580		17	15.5	194
HH	25	80	1.68	28.3447		60	30	30	120		16	14.4	192			HH	27	90	1.85	26.2966	8	240	240	100	580		15	13.5	177
II	20	58	1.72	19.6052		40	40	30	110		15	13.5	191			II	29	64	1.72	21.6333	9	300	380	0	680		12	10.8	177
JJ	23	76	1.75	24.8163		10	50	40	100		13	11.7	187			JJ	20	70	1.8	21.6049	10	200	380	240	820		17	15.5	170
KK	23	62	1.76	20.0155		90	0	20	110		15	13.5	183			KK	27	68	1.68	24.093	11	300	200	350	850		14	12.6	184
LL	23	75	1.87	21.4476		0	100	0	100		13	11.7	199			LL	20	82	1.79	25.5922	12	100	680	0	780		15	13.5	197
MM	20	76	1.8	23.4568		40	100	0	140		15	13.5	178			MM	25	95	1.86	27.4598	13	70	90	80	240		15	13.5	173
NN	31	91	1.86	26.3036		30	60	30	120		14	12.6	187			NN	21	69.5	1.82	20.9818	14	80	240	60	380		20	18	204
OO	24	87	1.72	29.4078		30	0	60	90		13	11.7	197			OO	27	85.5	1.83	25.5308	15	70	320	240	630		15	13.5	167
PP	23	80	1.73	26.7299		60	20	30	110		14	12.6	212			PP	32	87	1.86	25.1474	16	160	240	120	520		17	15.3	182
QQ	18	87	1.83	25.9787		80	0	40	120		16	14.4	193			QQ	28	74	1.66	26.8544	17	100	140	90	330		17	15.5	202
RR	19	62	1.66	22.4996		40	20	40	100		14	12.6	188			RR	24	81	1.8	25	18	0	260	30	290		19	17.1	197
SS	24	80	1.73	26.7299		70	30	30	130		16	14.4	197			SS	30	70	1.77	22.3435	19	0	180	150	330		15	13.5	198
TT	29	87	1.71	29.7527		60	40	30	130		14	12.6	198			TT	19	107	1.89	29.9544	20	110	100	50	260		14	12.6	210
VV	28	79	1.7	27.3356		40	80	0	120		14	12.6	199			VV	30	70	1.72	23.6614	21	20	50	150	220		16	14.5	185
UU	29	84	1.79	26.2164		40	50	30	120		14	12.6	183			UU	25	66	1.85	19.2841	22	30	400	20	450		14	12.6	184
XX	28	89	1.78	28.0899		60	40	30	130		15	13.5	183			XX	25	62	1.71	21.2031	23	70	130	40	240		18	16.2	201
YY	30	80	1.75	26.1224		100	0	0	100		13	11.7	182			YY	25	68	1.72	22.9854	24	30	30	400	460		16	14.5	184
WW	26	75	1.79	23.4075		30	80	0	110		11	9.9	190			WW	27	78	1.76	25.1808	25	0	20	400	420		15	13.5	194
ZZ	29	77	1.7	26.6436		40	50	30	120		15	13.5	206			ZZ	29	66	1.68	23.3844	26	0	240	80	320		15	13.5	208
AA1	26	77	1.71	26.3329		20	0	40	60		15	13.5	190			AA1	24	70	1.74	23.1206	27	20	30	150	200		15	13.5	199
BB1	26	80	1.75	26.1224		0	80	0	80		12	10.8	196			BB1	29	74	1.67	26.5338	28	100	180	30	310		16	14.5	188
CC1	24	77	1.71	26.3329		70	30	30	130		13	11.7	182			CC1	23	79	1.75	25.7959	29	150	90	150	390		15	13.5	193
MEAN	24.9655	76.4828	1.74517	25.0923		48.6207	39.6552	22.069	110.345		13.931	12.5379	192.414				25.7241	76.6897	1.76	24.7189		87.931	258.621	137.586	484.138		15.8621	14.3241	191.069
SD	3.61494	9.76489	0.0550624	2.88834		60.8802	64.2501	35.6087	43.5833		1.31125	1.18013	7.98929				3.54183	10.1127	0.0624776	2.54843		86.3185	170.935	114.791	196.601		1.63421	1.49774	11.6469
					IPAQ Calculation (MET.min.wk)																IPAQ Calculation (MET.min.wk)
						198	280	0	478													264	960	1280	2504
						165	160	160	485													0	2000	320	2320
						330	120	0	450													264	960	2800	4024
						99	360	0	459													198	1280	1200	2678
						396	0	0	396													594	2240	960	3794
						132	80	320	532													0	1920	1600	3520
						0	0	320	320													0	2160	320	2480
						198	120	240	558													792	960	800	2552
						132	160	240	532													990	1520	0	2510
						33	200	320	553													660	1520	1920	4100
						297	0	160	457													990	800	2800	4590
						0	400	0	400													330	2720	0	3050
						132	400	0	532													231	360	640	1231
						99	240	240	579													264	960	480	1704
						99	0	480	579													231	1280	1920	3431
						198	80	240	518													528	960	960	2448
						264	0	320	584													330	560	720	1610
						132	80	320	532													0	1040	240	1280
						231	120	240	591													0	720	1200	1920
						198	160	240	598													363	400	400	1163
						132	320	0	452													66	200	1200	1466
						132	200	240	572													99	1600	160	1859
						198	160	240	598													231	520	320	1071
						330	0	0	330													99	120	3200	3419
						99	320	0	419													0	80	3200	3280
						132	200	240	572													0	960	640	1600
						66	0	320	386													66	120	1200	1386
						0	320	0	320													330	720	240	1290
						231	120	240	591													495	360	1200	2055
					Mean	160.448	158.621	176.552	495.621												Mean	290.172	1034.48	1100.69	2425.34
					SD	100.452	128.5	142.435	88.4043												SD	289.893	695.843	934.581	1006.76
